# Supplementary material for: Interaction of different prototropic species of an anticancer drug ellipticine with HSA and IgG proteins: multispectroscopic and molecular modeling studies
Source: Royal Society of Chemistry journal article supplement (doi:10.1039/c4cp05734a), 2015-01-01
Supplement: c4cp05734a1.pdf [file c4cp05734a1.pdf]

# **Interaction of different prototropic species of an anticancer drug Ellipticine with HSA and IgG proteins: multispectroscopic and molecular modeling studies**

**Raina Thakur, Anupam Das, Vandna Sharma, Chandan Adhikari, Kalyan S Ghosh,\* and Anjan Chakraborty\***

**Author for correspondence:**

Dr. Anjan Chakraborty  
Department of Chemistry,  
Indian Institute of Technology Indore  
IET, M-Block, Indore 452017  
Email: [anjanc@iiti.ac.in](mailto:anjanc@iiti.ac.in)  
Fax: +91(0)731-2366382  
Tel: +91(0)731-2438706

Dr. Kalyan S. Ghosh  
Department of Chemistry,  
National Institute of Technology Hamirpur  
Himachal Pradesh 177005  
E-mail: [kalyan@nith.ac.in](mailto:kalyan@nith.ac.in)  
Fax: +91-1972-223834  
Tel: +91-1972-254104

## Supporting Information

**Table S1.** Distances (in Å) between interacting residues of HSA with the ligand

| HSA residue | Distance                |
|-------------|-------------------------|
| Lys 414 N   | 6.25 (N <sub>a</sub> )  |
| Arg 410 N   | 10.72 (N <sub>b</sub> ) |
| Arg 410 Nδ  | 9.63 (N <sub>a</sub> )  |
| Lys 414 Nε  | 8.15 (N <sub>a</sub> )  |
| Ser 489 O   | 10.82 (N <sub>a</sub> ) |

**Table S2.** Changes in accessible surface area of the amino acid residues of HSA on interaction with ellipticine

| HSA residue | ASA (uncomplexed)<br>(Å <sup>2</sup> ) | ASA (protein-inhibitor<br>complex) (Å <sup>2</sup> ) | ΔASA<br>(Å <sup>2</sup> ) |
|-------------|----------------------------------------|------------------------------------------------------|---------------------------|
| Arg 410     | 71.25                                  | 50.09                                                | 21.16                     |
| Lys 413     | 42.62                                  | 1.72                                                 | 40.9                      |
| Lys 414     | 13.38                                  | 6                                                    | 7.38                      |
| Glu 492     | 120.56                                 | 100.64                                               | 19.92                     |
| Val 493     | 62.01                                  | 30.49                                                | 31.52                     |
| Lys 538     | 200.32                                 | 178.64                                               | 21.68                     |
| Thr 540     | 21.97                                  | 5.23                                                 | 16.74                     |
| Lys 541     | 164.54                                 | 139.17                                               | 25.37                     |

**Table S3.** Changes in accessible surface area of the amino acid residues of F<sub>ab</sub> region of IgG protein on interaction with ellipticine

| Residues of F <sub>ab</sub> part | ASA of F <sub>ab</sub> residues uncomplexed (Å <sup>2</sup> ) | ASA of F <sub>ab</sub> part in IgG ligand complex (Å <sup>2</sup> ) |
|----------------------------------|---------------------------------------------------------------|---------------------------------------------------------------------|
| Phe 83                           | 34.5                                                          | 0                                                                   |
| Ala 84                           | 9.75                                                          | 0                                                                   |
| Leu 85                           | 48.58                                                         | 21.39                                                               |
| Arg 106                          | 89.27                                                         | 39.37                                                               |
| Gln 166                          | 36.22                                                         | 0                                                                   |
| Asp 167                          | 50.58                                                         | 4.69                                                                |
| Ser 168                          | 101.71                                                        | 10.9                                                                |

**Table S4.** Changes in accessible surface area of the amino acid residues of F<sub>c</sub> region of IgG protein on interaction with ellipticine

| Residues of F <sub>c</sub> region of IgG protein | ASA (uncomplexed) (Å <sup>2</sup> ) | ASA (protein-ligand complex) (Å <sup>2</sup> ) |
|--------------------------------------------------|-------------------------------------|------------------------------------------------|
| Ile 377                                          | 16.76                               | 1.93                                           |
| Ala 378                                          | 9.04                                | 0.3                                            |
| Val 379                                          | 14.76                               | 0.4                                            |
| Tyr 391                                          | 57.05                               | 20.27                                          |
| Thr 393                                          | 53.81                               | 6.38                                           |
| Thr 394                                          | 61.88                               | 24.55                                          |
| Pro 395                                          | 51.46                               | 16.22                                          |
| Leu 406                                          | 3.68                                | 0.02                                           |

**Table S5.** Lifetime components and normalized amplitudes of lifetime components and average lifetime of ellipticine in presence of HSA at 440 nm.<sup>#</sup>

| Conc. of HSA<br>( $\times 10^6$ M) | $a_1$ | $a_2$ | $\tau_1$ (ns) | $\tau_2$ (ns) | $\langle \tau \rangle$ (ns) |
|------------------------------------|-------|-------|---------------|---------------|-----------------------------|
| 0                                  | 0.84  | 0.16  | 0.42          | 4.50          | 1.1                         |
| 0.049                              | 0.83  | 0.17  | 0.87          | 6.50          | 1.82                        |
| 0.099                              | 0.83  | 0.17  | 1.10          | 7.48          | 2.18                        |
| 0.196                              | 0.78  | 0.22  | 1.16          | 12.38         | 3.63                        |
| 0.43                               | 0.73  | 0.27  | 1.28          | 14.46         | 4.83                        |
| 0.61                               | 0.67  | 0.33  | 1.59          | 16.13         | 6.38                        |
| 1                                  | 0.64  | 0.36  | 2.00          | 16.55         | 7.23                        |
| 3                                  | 0.61  | 0.39  | 2.18          | 15.09         | 7.21                        |
| 5                                  | 0.61  | 0.39  | 2.21          | 14.24         | 6.90                        |
| 7                                  | 0.61  | 0.39  | 2.16          | 13.90         | 6.73                        |
| 10                                 | 0.61  | 0.39  | 2.56          | 14.42         | 7.18                        |

<sup>#</sup> Error in measurement is around 5-7%.

**Table S6A.** Lifetime components, normalized amplitudes of lifetime components and average lifetime of ellipticine in presence of native and heat denatured IgG at 540 nm. <sup>#</sup>

**Native IgG**

| Conc. of IgG ( $\times 10^6$ M) | $a_1$ | $a_2$ | $\tau_1$ (ns) | $\tau_2$ (ns) | $\langle \tau \rangle$ (ns) |
|---------------------------------|-------|-------|---------------|---------------|-----------------------------|
| 0                               | 0.84  | 0.16  | 1.80          | 5.80          | 2.44                        |
| 0.025                           | 0.82  | 0.18  | 1.81          | 6.00          | 2.56                        |
| 0.05                            | 0.85  | 0.15  | 1.80          | 6.20          | 2.46                        |
| 0.1                             | 0.82  | 0.18  | 1.81          | 6.62          | 2.67                        |
| 0.2                             | 0.79  | 0.21  | 1.81          | 7.73          | 3.00                        |
| 0.3                             | 0.78  | 0.22  | 1.82          | 8.00          | 3.19                        |
| 0.4                             | 0.76  | 0.24  | 1.80          | 9.40          | 3.62                        |
| 0.5                             | 0.74  | 0.26  | 1.83          | 9.40          | 3.80                        |
| 0.6                             | 0.70  | 0.30  | 1.81          | 9.93          | 4.25                        |
| 0.7                             | 0.70  | 0.30  | 1.84          | 10.12         | 4.32                        |
| 0.8                             | 0.66  | 0.34  | 1.81          | 10.83         | 4.88                        |
| 0.9                             | 0.65  | 0.35  | 1.85          | 11.11         | 5.1                         |
| 1.0                             | 0.60  | 0.40  | 1.84          | 11.39         | 5.66                        |
| 2.0                             | 0.58  | 0.42  | 1.84          | 11.87         | 6.00                        |
| 3.0                             | 0.50  | 0.50  | 1.86          | 12.08         | 6.97                        |
| 4.0                             | 0.48  | 0.52  | 1.86          | 12.63         | 7.46                        |
| 5.0                             | 0.46  | 0.54  | 1.86          | 12.25         | 7.47                        |
| 7.0                             | 0.46  | 0.54  | 1.87          | 12.45         | 7.58                        |
| 10.0                            | 0.46  | 0.54  | 1.87          | 12.45         | 7.58                        |

| <b>Heat denatured IgG</b>                       |                         |                         |                                 |                                 |                                               |
|-------------------------------------------------|-------------------------|-------------------------|---------------------------------|---------------------------------|-----------------------------------------------|
| <b>Conc. of IgG (<math>\times 10^6</math>M)</b> | <b><math>a_1</math></b> | <b><math>a_2</math></b> | <b><math>\tau_1</math> (ns)</b> | <b><math>\tau_2</math> (ns)</b> | <b><math>\langle \tau \rangle</math> (ns)</b> |
| 0                                               | 0.84                    | 0.16                    | 1.8                             | 5.8                             | 2.44                                          |
| 0.025                                           | 0.81                    | 0.19                    | 1.57                            | 6.52                            | 2.51                                          |
| 0.05                                            | 0.78                    | 0.22                    | 1.43                            | 6.87                            | 2.63                                          |
| 0.1                                             | 0.76                    | 0.24                    | 1.45                            | 7.15                            | 2.82                                          |
| 0.2                                             | 0.75                    | 0.25                    | 1.42                            | 7.36                            | 2.90                                          |
| 0.4                                             | 0.74                    | 0.26                    | 1.41                            | 7.60                            | 3.0                                           |
| 0.6                                             | 0.73                    | 0.27                    | 1.35                            | 8.00                            | 3.16                                          |
| 0.8                                             | 0.73                    | 0.27                    | 1.35                            | 8.61                            | 3.31                                          |
| 1.0                                             | 0.73                    | 0.27                    | 1.41                            | 9.44                            | 3.58                                          |
| 2.0                                             | 0.74                    | 0.26                    | 1.49                            | 10.28                           | 3.77                                          |
| 3.0                                             | 0.73                    | 0.27                    | 1.53                            | 11.32                           | 4.17                                          |
| 5.0                                             | 0.70                    | 0.3                     | 1.62                            | 12.36                           | 4.84                                          |
| 7.0                                             | 0.69                    | 0.31                    | 1.64                            | 12.39                           | 4.97                                          |
| 10.0                                            | 0.68                    | 0.32                    | 1.58                            | 12.50                           | 5.10                                          |

# Error in measurement is around 5-7%.

**Table S6B.** Lifetime components, normalized amplitudes of lifetime components and average lifetime of ellipticine in presence of native and heat denatured IgG at 440 nm. #

| <b>Native IgG</b>                               |                         |                         |                                 |                                 |                                               |
|-------------------------------------------------|-------------------------|-------------------------|---------------------------------|---------------------------------|-----------------------------------------------|
| <b>Conc. of IgG (<math>\times 10^6</math>M)</b> | <b><math>a_1</math></b> | <b><math>a_2</math></b> | <b><math>\tau_1</math> (ns)</b> | <b><math>\tau_2</math> (ns)</b> | <b><math>\langle \tau \rangle</math> (ns)</b> |
| 0                                               | 0.84                    | 0.16                    | 0.42                            | 4.50                            | 1.10                                          |
| 0.025                                           | 0.80                    | 0.20                    | 0.40                            | 5.00                            | 1.32                                          |
| 0.05                                            | 0.80                    | 0.20                    | 0.42                            | 5.60                            | 1.45                                          |
| 0.1                                             | 0.78                    | 0.22                    | 0.42                            | 5.75                            | 1.59                                          |
| 0.2                                             | 0.83                    | 0.17                    | 0.83                            | 5.80                            | 1.67                                          |
| 0.4                                             | 0.80                    | 0.20                    | 0.84                            | 5.80                            | 1.83                                          |
| 0.5                                             | 0.785                   | 0.225                   | 0.86                            | 6.00                            | 2.00                                          |
| 0.7                                             | 0.77                    | 0.23                    | 1.00                            | 6.20                            | 2.21                                          |
| 0.8                                             | 0.76                    | 0.24                    | 0.97                            | 6.48                            | 2.29                                          |
| 1.0                                             | 0.75                    | 0.25                    | 0.99                            | 6.60                            | 2.39                                          |
| 2.0                                             | 0.74                    | 0.26                    | 1.12                            | 6.86                            | 2.61                                          |
| 3.0                                             | 0.74                    | 0.26                    | 1.10                            | 7.20                            | 2.69                                          |
| 5.0                                             | 0.74                    | 0.26                    | 1.20                            | 7.91                            | 2.94                                          |
| 7.0                                             | 0.74                    | 0.26                    | 1.19                            | 8.19                            | 3.00                                          |
| 10.0                                            | 0.74                    | 0.26                    | 1.10                            | 8.33                            | 2.98                                          |

  

| <b>Heat denatured IgG</b>                       |                         |                         |                                 |                                 |                                               |
|-------------------------------------------------|-------------------------|-------------------------|---------------------------------|---------------------------------|-----------------------------------------------|
| <b>Conc. of IgG (<math>\times 10^6</math>M)</b> | <b><math>a_1</math></b> | <b><math>a_2</math></b> | <b><math>\tau_1</math> (ns)</b> | <b><math>\tau_2</math> (ns)</b> | <b><math>\langle \tau \rangle</math> (ns)</b> |
| 0                                               | 0.84                    | 0.16                    | 0.42                            | 4.50                            | 1.10                                          |
| 0.025                                           | 0.80                    | 0.20                    | 0.55                            | 5.2                             | 1.50                                          |
| 0.05                                            | 0.78                    | 0.22                    | 0.64                            | 6.00                            | 1.83                                          |
| 0.1                                             | 0.77                    | 0.23                    | 0.64                            | 6.44                            | 1.97                                          |

|      |      |      |       |      |      |
|------|------|------|-------|------|------|
| 0.2  | 0.76 | 0.24 | 0.76  | 6.66 | 2.17 |
| 0.4  | 0.76 | 0.24 | 0.833 | 6.94 | 2.30 |
| 0.6  | 0.75 | 0.25 | 0.97  | 7.64 | 2.64 |
| 0.8  | 0.73 | 0.27 | 1.11  | 8.00 | 2.98 |
| 1.0  | 0.71 | 0.29 | 1.25  | 8.47 | 3.34 |
| 2.0  | 0.68 | 0.32 | 1.38  | 8.75 | 3.74 |
| 3.0  | 0.67 | 0.33 | 1.52  | 9.00 | 3.99 |
| 5.0  | 0.66 | 0.34 | 1.59  | 9.00 | 4.12 |
| 7.0  | 0.62 | 0.38 | 1.66  | 9.10 | 4.50 |
| 10.0 | 0.60 | 0.40 | 1.66  | 9.50 | 4.80 |

# Error in measurement is around 5-7%.
